# Supplementary material for: TMPRSS2-ERG -specific transcriptional modulation is associated with prostate cancer biomarkers and TGF-β signaling
Source: BMC Cancer. 2011 Dec 5;11:507. doi: 10.1186/1471-2407-11-507 (PMC3259213; doi:10.1186/1471-2407-11-507)
Supplement: Additional file 1 — Table S1. Clinical information for the analyzed prostate cancer patient cohort. [file 1471-2407-11-507-S1.XLS]

## Sheet: 090703_Heidelberg_korr Schl_Peh
ID	Group	Age	pT	pN	Gleason Score	PSA
IGP-21	T	68.0472	pT3b	N0	4+5	28
IGP-23	T	50.0194	pT2c	N0	4+3	8
IGP-25	T	61.4917	pT3a	N1	4+5	16.48
IGP-26	T	68.2167	pT4a	N1	5+4	4
IGP-28	T	61.5722	pT2c	NX	3+3	4.6
IGP-29	T	67.0722	pT3a	N0	4+3	6
IGP-30	T	62.9722	pT2c	N0	4+3	7.9
IGP-31	T	66.0222	pT3b	N0	4+4	4.4
IGP-32	T	69.3944	pT3b	N0	5+4	2.9
IGP-33	T	68.4722	pT3a	N1	4+5	40
IGP-35	T	63.1861	pT3b	N1	5+4	22.9
IGP-36	T	67.25	pT2c	N0	4+3	16.7
IGP-37	T	49.7111	pT2c	N0	4+3	14
IGP-38	T	66.175	pT3b	N1	4+5	48.55
IGP-39	T	63.8306	pT2c	N0	4+3	13.43
IGP-40	T	67.4667	pT3a	N1	4+3	12.66
IGP-41	T	66.3389	pT3b	N1	4+3	12
IGP-42	T	56.7278	pT4	N1	4+5	100
IGP-43	T	57.0167	pT2c	N0	3+4	7.5
IGP-44	T	68.1972	pT3a	N1	4+3	13.4
IGP-45	T	70.0083	pT3a	N0	4+3	15.5
IGP-47	T	61.2194	pT3a	N0	3+4	7.84
IGP-48	T	60.2361	pT3a	N0	3+4	6.27
IGP-49	T	73.8139	pT3b	N1	4+3	1.9
IGP-51	T	64.5	pT3b	N0	4+3	47
IGP-52	T	72.1528	pT2c	N0	4+3	4.1
IGP-54	T	68.5389	pT3a	N1	4+3	13.6
IGP-55	T	64.6139	pT3b	N0	4+3	30.5
IGP-57	T	62.6972	pT2c	N1	4+3	8.13
IGP-59	T	56.0583	pT3a	N0	3+4	10.5
IGP-60	T	70.4833	pT3b	N0	3+4	11.74
IGP-61	T	57.7472	pT3b	N0	3+4	19.93
IGP-62	T	62.5889	pT3b	N0	4+3	29.64
IGP-64	T	60.8111	pT2c	N0	3+4	5.4
IGP-80	T	51.0222	pT3a	N0	3+4	7.01
IGP-81	T	64.2333	pT3a	N0	4+3	23
IGP-82	T	66.6667	pT3a	N0	4+5	17.54
IGP-83	T	65.625	pT2c	N0	4+3	4.23
IGP-105	T	66.8611	pT2c	NX	3+3	6.4
IGP-110	T	57.0694	pT2c	N0	4+3	37.5
IGP-111	T	64.5944	pT2a	N0	3+4	7.8
IGP-113	T	68.2694	pT3a	N1	4+5	16.36
IGP-115	T	48.3861	pT2c	NX	3+3	NA
IGP-116	T	66.6167	pT3a	N0	3+4	6.5
IGP-117	T	66.9028	pT2a	NX	3+3	5.52
IGP-118	T	61.3278	pT3a	N0	3+4	16.8
IGP-190	T	64.5833	pT3b	N0	3+4	7.32
IGP-16	N	49.5944	pT2a	NX	3+3	4.2
IGP-17	N	58.9722	pT2a	NX	3+3	4.6
IGP-18	N	69.4083	pT2a	NX	3+3	11.4
IGP-20	N	54.4583	pT2a	NX	3+3	9.5
IGP-75	N	67.3139	pT2a	NX	3+4	2.29
IGP-76	N	58.8	pT2c	N0	3+3	8.53
IGP-78	N	69.6806	pT2c	NX	3+3	7.81
IGP-79	N	50.6833	pT2c	NX	3+4	5
IGP-84	N	50.7056	pT2a	NX	3+3	10
IGP-85	N	66.95	pT2c	NX	4+3	8.6
IGP-86	N	65.0194	pT2a	N0	3+4	4.47
IGP-87	N	72.4944	pT3a	NX	3+4	8
IGP-88	N	67.3333	pT2c	N0	4+3	7.23
IGP-89	N	48.9861	pT2c	NX	3+3	5.7
IGP-90	N	56.0333	pT2a	NX	3+3	1.71
IGP-91	N	57.2306	pT3a	N0	3+4	8.3
IGP-92	N	74.6917	pT2c	N0	3+4	11.36
IGP-102	N	61.7917	pT2c	N0	3+3	5.2
IGP-104	N	64.9917	pT2c	N0	4+3	9.7
IGP-119	N	60.4694	pT3a	N0	3+4	1.59
IGP-120	N	62.8861	pT2c	N0	3+4	4.18
IGP-122	N	60.7889	pT3a	N0	3+4	14.2
IGP-123	N	67.1139	pT3a	N0	3+4	12.8
IGP-124	N	68.9944	pT2c	NX	3+3	6.7
IGP-126	N	56.0333	pT2a	NX	3+3	1.71
IGP-127	N	68.8639	pT2c	NX	3+4	13.85
IGP-137	N	67.7111	pT2c	N0	3+3	8.36
IGP-138	N	51.0722	pT2c	NX	3+4	NA
IGP-139	N	71.1	pT3a	NX	3+4	6.34
IGP-141	N	65.9472	pT2a	NX	3+3	3.75
IGP-142	N	56.925	pT2c	NX	3+3	4.44
IGP-143	N	60.9639	pT3a	NX	3+4	9.06
IGP-144	N	70.8444	pT2c	NX	3+4	5.29
IGP-145	N	64.4639	pT2c	N0	3+3	8.51
IGP-174	N	58.275	pT2c	NX	3+3	6.2
IGP-175	N	66.9528	pT2c	N0	3+4	6.57
IGP-176	N	68.7278	pT2c	NX	3+3	1.75
IGP-177	N	70.9694	pT3a	N0	3+4	0.1
IGP-178	N	60.3139	pT2c	NX	3+3	7.45
IGP-179	N	59.7389	pT2a	N0	4+5	3.37
IGP-180	N	63.8083	pT2c	NX	3+4	5.3
IGP-181	N	62.4056	pT2c	NX	3+3	0.85
IGP-182	N	69.4056	pT2c	NX	3+4	4.06
IGP-183	N	68.0889	pT2a	N0	3+3	4.3
IGP-184	N	72.2639	pT3a	N0	3+4	4.5
IGP-185	N	57.5778	pT2c	NX	3+3	5.6
IGP-186	N	64.1917	pT2c	NX	3+3	5.51
IGP-188	N	60.3917	pT2c	NX	3+4	6.5
